# Supplementary material
Source: publisher figshare collection journal article supplement (https://diabetesjournals.figshare.com/articles/dataset/_/20427807)
Supplement: Supplementary file 1 [file 36759351]

## **Vitamin D Status, Vitamin D Receptor Polymorphisms, and Risk of Microvascular Complications among Individuals with Type 2 Diabetes: A Prospective Study**

Xue Chen, Zhenzhen Wan, Tingting Geng, Kai Zhu, Rui Li, Qi Lu, Xiaoyu Lin, Sen Liu, Liangkai Chen, Yanjun Guo, Zhilei Shan, Liegang Liu, An Pan, JoAnn E. Manson, Gang Liu

### **Online Supplementary Material**

**Supplementary Figure 1.** Flowchart of the study participants

**Supplementary Table 1.** Least-square means of cardiometabolic markers according to levels of serum 25(OH)D among patients with T2D in the UK Biobank

**Supplementary Table 2.** Serum 25(OH)D concentrations according to different VDR genotypes among patients with T2D in the UK Biobank

**Supplementary Table 3.** Multivariable-adjusted HRs (95% CIs) for associations between VDR polymorphisms and diabetic microvascular complications among patients with T2D in the UK Biobank

**Supplementary Table 4.** Multivariable-adjusted HRs (95% CIs) for associations between serum 25(OH)D concentrations and diabetic microvascular complications among patients with T2D according to different genotypes of VDR polymorphisms

**Supplementary Table 5.** Stratified analyses of the associations between serum 25(OH)D concentrations and composite diabetic microvascular complications among patients with T2D

**Supplementary Table 6.** Multivariable-adjusted HRs (95% CIs) of diabetic microvascular complications according to serum 25(OH)D concentrations among patients with T2D after excluding outcomes occurred within 2 years of follow up

**Supplementary Table 7.** Multivariable-adjusted HRs (95% CIs) of diabetic microvascular complications according to serum 25(OH)D concentrations among patients with T2D with further adjustment of CRP

**Supplementary Table 8.** Multivariable-adjusted HRs (95% CIs) of diabetic microvascular complications according to serum 25(OH)D concentrations among patients with T2D with further adjustment of lipid profiles

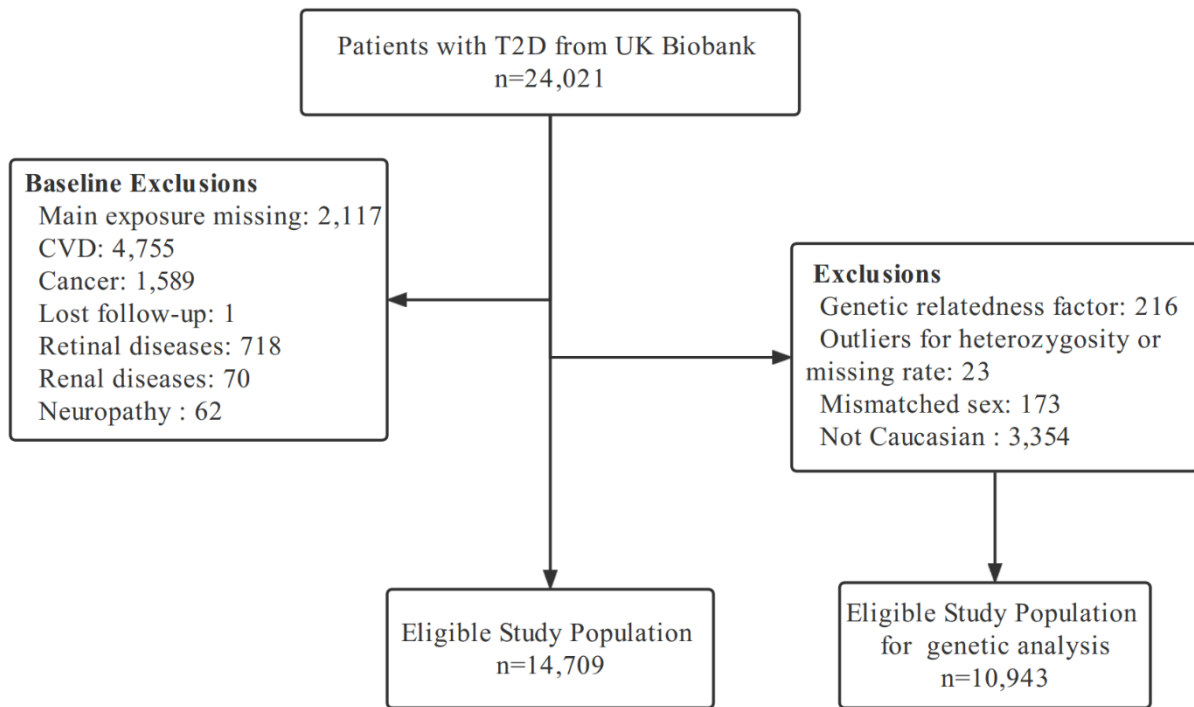

**Supplementary Figure 1.** Flowchart of the study participants

**Supplementary Table 1.** Least-square means of cardiometabolic markers according to levels of serum 25(OH)D among patients with T2D in the UK Biobank

| Characteristics                                   | Serum 25(OH)D concentrations (nmol/L) |              |              |              | <i>P</i> <sub>trend</sub> |
|---------------------------------------------------|---------------------------------------|--------------|--------------|--------------|---------------------------|
|                                                   | < 25.0                                | 25.0-49.9    | 50.0-74.9    | ≥ 75.0       |                           |
| Glucose (n=13,458, mmol/L)                        | 7.82 ± 0.12                           | 7.35 ± 0.10  | 7.04 ± 0.11  | 6.75 ± 0.15  | <0.001                    |
| HbA <sub>1c</sub> (n=13,891, mmol/mol)            | 55.31 ± 0.45                          | 53.58 ± 0.40 | 52.38 ± 0.43 | 50.69 ± 0.58 | <0.001                    |
| High density cholesterol (n=13,469, mmol/L)       | 1.29 ± 0.01                           | 1.28 ± 0.01  | 1.29 ± 0.01  | 1.30 ± 0.01  | 0.409                     |
| Low density cholesterol direct (n=14,663, mmol/L) | 2.88 ± 0.02                           | 2.80 ± 0.02  | 2.70 ± 0.02  | 2.54 ± 0.03  | <0.001                    |
| Triglyceride (n=14,681, mmol/L)                   | 2.28 ± 0.04                           | 1.99 ± 0.04  | 1.67 ± 0.04  | 1.35 ± 0.05  | <0.001                    |
| Total cholesterol (n=14,701, mmol/L)              | 4.83 ± 0.03                           | 4.68 ± 0.03  | 4.53 ± 0.03  | 4.30 ± 0.04  | <0.001                    |

The least-square mean ( $\pm$  SE) were estimated using the general linear model with the adjustment of age (continuous), sex (female, male), ethnic (White people, non-White people [including Black people, Asian people, and multiethnic participants]), the Townsend Deprivation Index (continuous), education (College/University degree, A levels/AS levels or equivalent or O levels/GCSEs or equivalent or other professional qualifications, none of the above), employed (yes, no), smoking status (never, past, current), drinking status (never, 1-2 times/week, 3-4 times/week,  $\geq$ 5 times/week), healthy diet (yes, no), use of multivitamin/mineral supplements (yes, no), total physical activity level (MET-minutes/week, continuous), time spend outdoors in summer (continuous, hours/day), season of blood drawn (March to May, June to August, September to November, December to February), estimated glomerular filtration rate (eGFR,  $\leq$ 90,  $>$ 90 mL/min/1.73 m<sup>2</sup>), BMI (continuous), history of hypertension (yes, no), diabetic medication (no insulin or pills, only diabetes pills, or insulin and/or others), and diabetes duration ( $\leq$ 3, 3-10 years,  $>$ 10 years).

**Supplementary Table 2.** Serum 25(OH)D concentrations according to different VDR genotypes among patients with T2D in the UK Biobank

|                                | Serum 25(OH)D, nmol/L | <i>P</i> value |
|--------------------------------|-----------------------|----------------|
| <b>rs7975232 (<i>Apal</i>)</b> |                       | 0.601          |
| CC (N=2,486)                   | 43.4 (30.5, 58.5)     |                |
| AC (N=5,397)                   | 43.7 (30.2, 59.1)     |                |
| AA (N=3,060)                   | 42.9 (29.2, 58.6)     |                |
| <b>rs1544410 (<i>BsmI</i>)</b> |                       | 0.289          |
| CC (N=3,831)                   | 43.9 (30.5, 59.2)     |                |
| CT (N=5,267)                   | 43.4 (29.9, 58.9)     |                |
| TT (N=1,845)                   | 42.6 (29.3, 57.8)     |                |
| <b>rs2228570 (<i>FokI</i>)</b> |                       | 0.462          |
| AA (N=1,667)                   | 43.8 (30.1, 59.1)     |                |
| AG (N=5,171)                   | 43.3 (30.1, 58.3)     |                |
| GG (N=4,105)                   | 43.5 (30.1, 59.4)     |                |
| <b>rs731236 (<i>TaqI</i>)</b>  |                       | 0.238          |
| AA (N=3,882)                   | 43.9 (30.7, 59.3)     |                |
| AG (N=5,252)                   | 43.4 (29.8, 58.8)     |                |
| GG (N=1,809)                   | 42.6 (29.3, 57.7)     |                |

Data are presented as median (interquartile range).

**Supplementary Table 3.** Multivariable-adjusted HRs (95% CIs) for associations between VDR polymorphisms and diabetic microvascular complications among patients with T2D in the UK Biobank

|                                | <b>Composite<br/>microvascular<br/>complications</b> | <b>Diabetic<br/>retinopathy</b> | <b>Diabetic<br/>nephropathy</b> | <b>Diabetic<br/>neuropathy</b> |
|--------------------------------|------------------------------------------------------|---------------------------------|---------------------------------|--------------------------------|
|                                | HR (95% CI)                                          | HR (95% CI)                     | HR (95% CI)                     | HR (95% CI)                    |
| <b>rs7975232 (<i>Apal</i>)</b> |                                                      |                                 |                                 |                                |
| CC (n=2,486)                   | 1 (ref.)                                             | 1 (ref.)                        | 1 (ref.)                        | 1 (ref.)                       |
| AC (n=5,397)                   | 1.03 (0.88, 1.21)                                    | 1.10 (0.85, 1.44)               | 0.95 (0.77, 1.17)               | 1.16 (0.82, 1.64)              |
| AA (n=3,060)                   | 1.12 (0.95, 1.33)                                    | 1.15 (0.85, 1.51)               | 1.11 (0.89, 1.39)               | 1.23 (0.84, 1.79)              |
| <b>rs1544410 (<i>BsmI</i>)</b> |                                                      |                                 |                                 |                                |
| CC (n=3,831)                   | 1 (ref.)                                             | 1 (ref.)                        | 1 (ref.)                        | 1 (ref.)                       |
| CT (n=5,267)                   | 1.02 (0.89, 1.17)                                    | 1.12 (0.89, 1.41)               | 0.98 (0.82, 1.17)               | 1.08 (0.80, 1.46)              |
| TT (n=1,845)                   | 1.23 (1.04, 1.46)                                    | 1.16 (0.86, 1.55)               | 1.23 (0.99, 1.54)               | 1.44 (1.01, 2.05)              |
| <b>rs2228570 (<i>FokI</i>)</b> |                                                      |                                 |                                 |                                |
| AA (n=1,667)                   | 1 (ref.)                                             | 1 (ref.)                        | 1 (ref.)                        | 1 (ref.)                       |
| AG (n=5,171)                   | 0.92 (0.77, 1.09)                                    | 1.01 (0.76, 1.36)               | 0.96 (0.76, 1.21)               | 1.04 (0.72, 1.52)              |
| GG (n=4,105)                   | 0.97 (0.81, 1.16)                                    | 1.02 (0.75, 1.38)               | 1.05 (0.83, 1.33)               | 1.07 (0.72, 1.57)              |
| <b>rs731236 (<i>TaqI</i>)</b>  |                                                      |                                 |                                 |                                |
| AA (n=3,882)                   | 1 (ref.)                                             | 1 (ref.)                        | 1 (ref.)                        | 1 (ref.)                       |
| AG (n=5,252)                   | 1.03 (0.89, 1.18)                                    | 1.06 (0.85, 1.33)               | 0.98 (0.82, 1.18)               | 1.09 (0.81, 1.47)              |
| GG (n=1,809)                   | 1.23 (1.03, 1.46)                                    | 1.17 (0.88, 1.57)               | 1.21 (0.97, 1.52)               | 1.41 (0.99, 2.02)              |

HR was adjusted for age (continuous), sex (female, male), ethnic (White people, non-White people [including Black people, Asian people, and multiethnic participants]), the Townsend Deprivation Index (continuous), education (College/University degree, A levels/AS levels or equivalent or O levels/GCSEs or equivalent or other professional qualifications, none of the above), employed (yes, no), smoking status (never, past, current), drinking status (never, 1-2 times/week, 3-4 times/week,  $\geq 5$  times/week), healthy diet (yes, no), use of multivitamin/mineral supplements (yes, no), total physical activity level (MET-minutes /week, continuous), time spend outdoors in summer (continuous, hours/day), season of blood drawn (March to May, June to August, September to November, December to February), estimated glomerular filtration rate (eGFR,  $\leq 90$ ,  $>90$  mL/min/1.73 m<sup>2</sup>), BMI (continuous), history of hypertension (yes, no), and hypercholesterolemia (yes, no), diabetic medication (no insulin or pills, only diabetes pills, or insulin and/or others), diabetes duration ( $\leq 3$ , 3-10 years,  $>10$  years), HbA<sub>1c</sub> ( $<7\%$ ,  $\geq 7\%$  [ $<53$ , or  $\geq 53$  mmol/mol]), genotype measurement batch, and ten principal components of ancestry.

**Supplementary Table 4.** Multivariable-adjusted HRs (95% CIs) for associations between serum 25(OH)D concentrations and diabetic microvascular complications among patients with T2D according to different genotypes of VDR polymorphisms

|                                | Composite microvascular complications |                          |                                 | Diabetic retinopathy |                          |                                 | Diabetic nephropathy |                          |                                 | Diabetic neuropathy |                          |                                 |
|--------------------------------|---------------------------------------|--------------------------|---------------------------------|----------------------|--------------------------|---------------------------------|----------------------|--------------------------|---------------------------------|---------------------|--------------------------|---------------------------------|
|                                | Cases                                 | HR (95% CI) <sup>a</sup> | <i>P</i> <sub>interaction</sub> | Case                 | HR (95% CI) <sup>a</sup> | <i>P</i> <sub>interaction</sub> | Cases                | HR (95% CI) <sup>a</sup> | <i>P</i> <sub>interaction</sub> | Cases               | HR (95% CI) <sup>a</sup> | <i>P</i> <sub>interaction</sub> |
| <b>rs7975232 (<i>Apal</i>)</b> |                                       |                          | 0.841                           |                      |                          | 0.959                           |                      |                          | 0.552                           |                     |                          | 0.406                           |
| CC (n=2,486)                   | 224                                   | 0.85 (0.61, 1.19)        |                                 | 77                   | 0.68 (0.39, 1.19)        |                                 | 136                  | 0.90 (0.58, 1.39)        |                                 | 45                  | 0.72 (0.34, 1.51)        |                                 |
| AC (n=5,397)                   | 510                                   | 0.67 (0.54, 0.83)        |                                 | 193                  | 0.76 (0.53, 1.08)        |                                 | 283                  | 0.54 (0.40, 0.72)        |                                 | 118                 | 0.67 (0.43, 1.04)        |                                 |
| AA (n=3,060)                   | 318                                   | 0.75 (0.58, 0.99)        |                                 | 113                  | 0.74 (0.47, 1.17)        |                                 | 191                  | 0.61(0.43, 0.86)         |                                 | 74                  | 0.84 (0.48, 1.47)        |                                 |
| <b>rs1544410 (<i>BsmI</i>)</b> |                                       |                          | 0.274                           |                      |                          | 0.159                           |                      |                          | 0.286                           |                     |                          | 0.600                           |
| CC (n=3,831)                   | 350                                   | 0.78 (0.60, 1.01)        |                                 | 121                  | 0.65 (0.42, 1.01)        |                                 | 208                  | 0.83 (0.59, 1.18)        |                                 | 73                  | 0.69 (0.40, 1.21)        |                                 |
| CT (n=5,267)                   | 489                                   | 0.72 (0.58, 0.90)        |                                 | 190                  | 1.02 (0.71, 1.45)        |                                 | 275                  | 0.52 (0.39, 0.69)        |                                 | 110                 | 0.71 (0.45, 1.12)        |                                 |
| TT (n=1,845)                   | 213                                   | 0.65 (0.46, 0.91)        |                                 | 72                   | 0.42 (0.23, 0.75)        |                                 | 127                  | 0.63 (0.41, 0.97)        |                                 | 54                  | 0.74 (0.37, 1.50)        |                                 |
| <b>rs2228570 (<i>FokI</i>)</b> |                                       |                          | 0.329                           |                      |                          | 0.533                           |                      |                          | 0.362                           |                     |                          | 0.751                           |
| AA (n=1,667)                   | 174                                   | 0.80 (0.56, 1.16)        |                                 | 60                   | 0.65 (0.35, 1.22)        |                                 | 97                   | 0.67 (0.41, 1.10)        |                                 | 36                  | 1.55 (0.67, 3.58)        |                                 |
| AG (n=5,171)                   | 478                                   | 0.76 (0.61, 0.95)        |                                 | 179                  | 0.81 (0.56, 1.16)        |                                 | 276                  | 0.68 (0.50, 0.91)        |                                 | 110                 | 0.65 (0.41, 1.02)        |                                 |
| GG (n=4,105)                   | 400                                   | 0.70 (0.54, 0.89)        |                                 | 144                  | 0.72 (0.48, 1.08)        |                                 | 237                  | 0.58 (0.42, 0.79)        |                                 | 91                  | 0.72 (0.43, 1.20)        |                                 |
| <b>rs731236 (<i>TaqI</i>)</b>  |                                       |                          | 0.244                           |                      |                          | 0.158                           |                      |                          | 0.245                           |                     |                          | 0.637                           |
| AA (n=3,882)                   | 354                                   | 0.78 (0.61, 1.02)        |                                 | 126                  | 0.67 (0.44, 1.03)        |                                 | 211                  | 0.82 (0.58, 1.17)        |                                 | 74                  | 0.73 (0.42, 1.27)        |                                 |
| AG (n=5,252)                   | 491                                   | 0.71 (0.57, 0.88)        |                                 | 184                  | 0.98 (0.68, 1.41)        |                                 | 277                  | 0.51 (0.39, 0.68)        |                                 | 111                 | 0.71 (0.45, 1.12)        |                                 |
| GG (n=1,809)                   | 207                                   | 0.67 (0.47, 0.94)        |                                 | 73                   | 0.45 (0.25, 0.80)        |                                 | 122                  | 0.64 (0.41, 1.00)        |                                 | 52                  | 0.75 (0.36, 1.55)        |                                 |

HR was adjusted for age (continuous), sex (female, male), ethnic (White people, non-White people [including Black people, Asian people, and multiethnic participants]), the Townsend Deprivation Index (continuous), education (College/University degree, A levels/AS levels or equivalent or O levels/GCSEs or equivalent or other professional qualifications, none of the above), employed (yes, no), smoking status (never, past, current), drinking status (never, 1-2 times/week, 3-4 times/week,  $\geq 5$  times/week), healthy diet (yes, no), use of multivitamin/mineral supplements (yes, no), total physical activity level (MET-minutes /week, continuous), time spend outdoors in summer (continuous, hours/day), season of blood drawn (March to May, June to August, September to November, December to February), estimated glomerular filtration rate (eGFR,  $\leq 90$ ,  $>90$  mL/min/1.73 m<sup>2</sup>), BMI (continuous), history of hypertension (yes, no), and hypercholesterolemia (yes, no), diabetic medication (no insulin or pills, only diabetes pills, or insulin and/or others), diabetes duration ( $\leq 3$ , 3-10 years,  $>10$  years), HbA1c ( $<7\%$ ,  $\geq 7\%$  [ $<53$  nmol/L,  $\geq 53$  nmol/L]), genotype measurement batch, and ten principal components of ancestry. <sup>a</sup>HR indicated the risk for per one unit increment in serum 25(OH)D concentration.

**Supplementary Table 5.** Stratified analyses of the associations between serum 25(OH)D concentrations and composite diabetic microvascular complications among patients with T2D

|                              | Serum 25(OH)D concentrations (nmol/L) |                                |                                |                             | <i>P</i> interaction | Natural log-transformed<br>25(OH)D |
|------------------------------|---------------------------------------|--------------------------------|--------------------------------|-----------------------------|----------------------|------------------------------------|
|                              | < 25.0                                | 25.0-49.9                      | 50.0-74.9                      | ≥ 75.0                      |                      |                                    |
| <b>Age, years</b>            |                                       |                                |                                |                             | 0.708                |                                    |
| ≤60                          | 137/1,823<br>1 (ref.)                 | 227/3,257<br>0.94 (0.75, 1.17) | 69/1,572<br>0.59 (0.43, 0.81)  | 12/411<br>0.42 (0.23, 0.78) |                      | 0.75 (0.60, 0.92)                  |
| >60                          | 172/1,148<br>1 (ref.)                 | 407/3,402<br>0.77 (0.64, 0.93) | 268/2,370<br>0.74 (0.60, 0.92) | 78/726<br>0.71 (0.53, 0.96) |                      | 0.76 (0.65, 0.89)                  |
| <b>Sex</b>                   |                                       |                                |                                |                             | 0.306                |                                    |
| Female                       | 123/1,248<br>1 (ref.)                 | 255/2,568<br>0.94 (0.75, 1.17) | 111/1,432<br>0.74 (0.56, 0.98) | 29/409<br>0.68 (0.44, 1.05) |                      | 0.80 (0.66, 0.98)                  |
| Male                         | 186/1,723<br>1 (ref.)                 | 379/4,091<br>0.77 (0.64, 0.93) | 226/2,510<br>0.68 (0.55, 0.86) | 61/728<br>0.64 (0.47, 0.89) |                      | 0.72 (0.61, 0.85)                  |
| <b>BMI, kg/m<sup>2</sup></b> |                                       |                                |                                |                             | 0.165                |                                    |
| <30                          | 112/1,196<br>1 (ref.)                 | 208/2,791<br>0.72 (0.56, 0.92) | 157/2,030<br>0.68 (0.52, 0.91) | 43/702<br>0.50 (0.34, 0.75) |                      | 0.70 (0.57, 0.85)                  |
| ≥30                          | 197/1,775<br>1 (ref.)                 | 426/3,868<br>0.92 (0.77, 1.10) | 180/1,912<br>0.72 (0.58, 0.91) | 47/435<br>0.86 (0.61, 1.21) |                      | 0.80 (0.68, 0.94)                  |
| <b>Smoking status</b>        |                                       |                                |                                |                             | 0.182                |                                    |
| Current/ past                | 172/1,462<br>1 (ref.)                 | 344/3,406<br>0.79 (0.65, 0.96) | 200/2,130<br>0.69 (0.55, 0.87) | 52/633<br>0.61 (0.43, 0.85) |                      | 0.69 (0.59, 0.82)                  |
| Never                        | 135/1,481<br>1 (ref.)                 | 286/3,224<br>0.86 (0.69, 1.07) | 136/1,808<br>0.71 (0.54, 0.93) | 38/503<br>0.70 (0.47, 1.04) |                      | 0.80 (0.66, 0.97)                  |

|                                  |           |                   |                   |                   |                   |
|----------------------------------|-----------|-------------------|-------------------|-------------------|-------------------|
| <b>Physical activity level</b>   |           |                   |                   |                   | 0.030             |
| <150 MET minutes/week            | 191/1,712 | 326/3,448         | 149/1,763         | 39/478            |                   |
|                                  | 1 (ref.)  | 0.76 (0.63, 0.92) | 0.66 (0.52, 0.84) | 0.70 (0.48, 1.01) | 0.68 (0.57, 0.81) |
| ≥150 MET-minutes/week            | 83/944    | 228/2,586         | 162/1,891         | 47/591            |                   |
|                                  | 1 (ref.)  | 0.90 (0.69, 1.17) | 0.81 (0.60, 1.08) | 0.67 (0.45, 1.00) | 0.83 (0.67, 1.03) |
| <b>Diabetes duration (years)</b> |           |                   |                   |                   | 0.325             |
| ≤3                               | 80/1,145  | 141/2,547         | 97/1,534          | 29/438            |                   |
|                                  | 1 (ref.)  | 0.72 (0.54, 0.96) | 0.78 (0.56, 1.10) | 0.77 (0.48, 1.23) | 0.77 (0.59, 0.99) |
| >3                               | 215/1,620 | 463/3,725         | 226/2,210         | 59/632            |                   |
|                                  | 1 (ref.)  | 0.86 (0.73, 1.02) | 0.66 (0.54, 0.82) | 0.62 (0.45, 0.85) | 0.72 (0.62, 0.84) |
| <b>HbA<sub>1c</sub></b>          |           |                   |                   |                   | 0.512             |
| <7% (<53 nmol/L)                 | 154/1,736 | 330/4,228         | 201/2,697         | 61/824            |                   |
|                                  | 1 (ref.)  | 0.78 (0.64, 0.95) | 0.71 (0.56, 0.90) | 0.67 (0.48, 0.93) | 0.75 (0.64, 0.90) |
| ≥7% (≥53 nmol/L)                 | 155/1,235 | 301/2431          | 134/1,245         | 28/295            |                   |
|                                  | 1 (ref.)  | 0.89 (0.73, 1.10) | 0.71 (0.54, 0.91) | 0.61 (0.40, 0.94) | 0.75 (0.62, 0.90) |

HR was adjusted for age (continuous), sex (female, male), ethnic (White people, non-White people [including Black people, Asian people, and multiethnic participants]), the Townsend Deprivation Index (continuous), education (College/University degree, A levels/AS levels or equivalent or O levels/GCSEs or equivalent or other professional qualifications, none of the above), employed (yes, no), smoking status (never, past, current), drinking status (never, 1-2 times/week, 3-4 times/week, ≥5 times/week), healthy diet (yes, no), use of multivitamin/mineral supplements (yes, no), total physical activity level (MET-minutes /week, continuous), time spend outdoors in summer (continuous, hours/day), season of blood drawn (March to May, June to August, September to November, December to February), estimated glomerular filtration rate (eGFR, ≤90, >90 mL/min/1.73 m<sup>2</sup>), BMI (continuous), history of hypertension (yes, no), and hypercholesterolemia (yes, no), diabetic medication (no insulin or pills, only diabetes pills, or insulin and/or others), diabetes duration (≤3, 3-10 years, >10 years), HbA<sub>1c</sub> (<7%, ≥7% [ $<53$  nmol/L,  $\geq 53$  nmol/L]). The strata variable was not included in the model when stratifying by itself.



**Supplementary Table 6.** Multivariable-adjusted HRs (95% CIs) of diabetic microvascular complications according to serum 25(OH)D concentrations among patients with T2D after excluding outcomes occurred within 2 years of follow up

|                                              | Serum 25(OH)D concentrations (nmol/L) |                   |                   |                   | <i>P</i> <sub>trend</sub> | Natural log-transformed<br>25(OH)D |
|----------------------------------------------|---------------------------------------|-------------------|-------------------|-------------------|---------------------------|------------------------------------|
|                                              | < 25.0                                | 25.0-49.9         | 50.0-74.9         | ≥ 75.0            |                           |                                    |
| <b>Composite microvascular complications</b> | 265/2,927                             | 559/6,584         | 301/3,906         | 80/1,127          |                           |                                    |
|                                              | 1 (ref.)                              | 0.85 (0.73, 1.00) | 0.74 (0.61, 0.89) | 0.68 (0.52, 0.89) | <0.001                    | 0.77 (0.68, 0.88)                  |
| <b>Diabetic retinopathy</b>                  | 95/2,927                              | 202/6,584         | 114/3,906         | 23/1,127          |                           |                                    |
|                                              | 1 (ref.)                              | 0.90 (0.70, 1.16) | 0.81 (0.60, 1.10) | 0.56 (0.34, 0.92) | 0.023                     | 0.76 (0.61, 0.95)                  |
| <b>Diabetic nephropathy</b>                  | 162/2,927                             | 337/6,584         | 174/3,906         | 47/1,127          |                           |                                    |
|                                              | 1 (ref.)                              | 0.80 (0.66, 0.97) | 0.66 (0.52, 0.83) | 0.61 (0.43, 0.87) | <0.001                    | 0.71 (0.60, 0.85)                  |
| <b>Diabetic neuropathy</b>                   | 62/2,927                              | 101/6,584         | 63/3,906          | 14/1,127          |                           |                                    |
|                                              | 1 (ref.)                              | 0.72 (0.51, 1.00) | 0.74 (0.49, 1.10) | 0.59 (0.32, 1.12) | 0.131                     | 0.80 (0.60, 1.09)                  |

HR was adjusted for age (continuous), sex (female, male), ethnic (White people, non-White people [including Black people, Asian people, and multiethnic participants]), the Townsend Deprivation Index (continuous), education (College/University degree, A levels/AS levels or equivalent or O levels/GCSEs or equivalent or other professional qualifications, none of the above), employed (yes, no), smoking status (never, past, current), drinking status (never, 1-2 times/week, 3-4 times/week, ≥5 times/week), healthy diet (yes, no), use of multivitamin/mineral supplements (yes, no), total physical activity level (MET-minutes/week, continuous), time spend outdoors in summer (continuous, hours/day), season of blood drawn (March to May, June to August, September to November, December to February), estimated glomerular filtration rate (eGFR, ≤90, >90 mL/min/1.73 m<sup>2</sup>), BMI (continuous), history of hypertension (yes, no), and hypercholesterolemia (yes, no), diabetic medication (no insulin or pills, only diabetes pills, or insulin and/or others), diabetes duration (≤3, 3-10 years, >10 years), HbA<sub>1c</sub> (<7%, ≥7% [ $<53$  nmol/L,  $\geq 53$  nmol/L]).

**Supplementary Table 7.** Multivariable-adjusted HRs (95% CIs) of diabetic microvascular complications according to serum 25(OH)D concentrations among patients with T2D with further adjustment of CRP

|                                              | Serum 25(OH)D concentrations (nmol/L) |                   |                   |                   | <i>P</i> <sub>trend</sub> | Natural log-transformed<br>25(OH)D |
|----------------------------------------------|---------------------------------------|-------------------|-------------------|-------------------|---------------------------|------------------------------------|
|                                              | < 25.0                                | 25.0-49.9         | 50.0-74.9         | ≥ 75.0            |                           |                                    |
| <b>Composite microvascular complications</b> | 309/2,971                             | 634/6,659         | 337/3,942         | 90/1,137          |                           |                                    |
|                                              | 1 (ref.)                              | 0.83 (0.72, 0.96) | 0.71 (0.60, 0.84) | 0.66 (0.51, 0.85) | <0.001                    | 0.75 (0.66, 0.85)                  |
| <b>Diabetic retinopathy</b>                  | 114/2,971                             | 248/6,659         | 134/3,942         | 31/1,137          |                           |                                    |
|                                              | 1 (ref.)                              | 0.91 (0.72, 1.15) | 0.78 (0.59, 1.04) | 0.62 (0.40, 0.95) | 0.014                     | 0.75 (0.61, 0.92)                  |
| <b>Diabetic nephropathy</b>                  | 182/2,971                             | 367/6,659         | 183/3,942         | 49/1,137          |                           |                                    |
|                                              | 1 (ref.)                              | 0.78 (0.65, 0.94) | 0.61 (0.48, 0.77) | 0.56 (0.40, 0.79) | <0.001                    | 0.67 (0.57, 0.79)                  |
| <b>Diabetic neuropathy</b>                   | 80/2,971                              | 128/6,659         | 76/3,942          | 14/1,137          |                           |                                    |
|                                              | 1 (ref.)                              | 0.71 (0.53, 0.96) | 0.72 (0.50, 1.03) | 0.49 (0.27, 0.90) | 0.031                     | 0.77 (0.59, 1.01)                  |

HR was adjusted for age (continuous), sex (female, male), ethnic (White people, non-White people [including Black people, Asian people, and multiethnic participants]), the Townsend Deprivation Index (continuous), education (College/University degree, A levels/AS levels or equivalent or O levels/GCSEs or equivalent or other professional qualifications, none of the above), employed (yes, no), smoking status (never, past, current), drinking status (never, 1-2 times/week, 3-4 times/week, ≥5 times/week), healthy diet (yes, no), use of multivitamin/mineral supplements (yes, no), total physical activity level (MET-minutes/week, continuous), time spend outdoors in summer (continuous, hours/day), season of blood drawn (March to May, June to August, September to November, December to February), estimated glomerular filtration rate (eGFR, ≤90, >90 mL/min/1.73 m<sup>2</sup>), BMI (continuous), history of hypertension (yes, no), and hypercholesterolemia (yes, no), diabetic medication (no insulin or pills, only diabetes pills, or insulin and/or others), diabetes duration (≤3, 3-10 years, >10 years), HbA<sub>1c</sub> (<7%, ≥7% [ $<53$  nmol/L,  $\geq 53$  nmol/L]), CRP (mg/L, continuous).

**Supplementary Table 8.** Multivariable-adjusted HRs (95% CIs) of diabetic microvascular complications according to serum 25(OH)D concentrations among patients with T2D with further adjustment of lipid profiles

|                                              | Serum 25(OH)D concentrations (nmol/L) |                   |                   |                   | <i>P</i> <sub>trend</sub> | Natural log-transformed<br>25(OH)D |
|----------------------------------------------|---------------------------------------|-------------------|-------------------|-------------------|---------------------------|------------------------------------|
|                                              | < 25.0                                | 25.0-49.9         | 50.0-74.9         | ≥ 75.0            |                           |                                    |
| <b>Composite microvascular complications</b> | 309/2,971                             | 634/6,659         | 337/3,942         | 90/1,137          |                           |                                    |
|                                              | 1 (ref.)                              | 0.84 (0.73, 0.97) | 0.72 (0.61, 0.86) | 0.68 (0.52, 0.88) | <0.001                    | 0.77 (0.67, 0.87)                  |
| <b>Diabetic retinopathy</b>                  | 114/2,971                             | 248/6,659         | 134/3,942         | 31/1,137          |                           |                                    |
|                                              | 1 (ref.)                              | 0.90 (0.72, 1.14) | 0.77 (0.58, 1.03) | 0.61 (0.39, 0.94) | 0.013                     | 0.74 (0.60, 0.91)                  |
| <b>Diabetic nephropathy</b>                  | 182/2,971                             | 367/6,659         | 183/3,942         | 49/1,137          |                           |                                    |
|                                              | 1 (ref.)                              | 0.78 (0.65, 0.95) | 0.62 (0.49, 0.79) | 0.58 (0.41, 0.83) | <0.001                    | 0.68 (0.58, 0.81)                  |
| <b>Diabetic neuropathy</b>                   | 80/2,971                              | 128/6,659         | 76/3,942          | 14/1,137          |                           |                                    |
|                                              | 1 (ref.)                              | 0.74 (0.55, 1.00) | 0.78 (0.54, 1.12) | 0.55 (0.30, 1.02) | 0.100                     | 0.83 (0.63, 1.10)                  |

HR was adjusted for age (continuous), sex (female, male), ethnic (White people, non-White people [including Black people, Asian people, and multiethnic participants]), the Townsend Deprivation Index (continuous), education (College/University degree, A levels/AS levels or equivalent or O levels/GCSEs or equivalent or other professional qualifications, none of the above), employed (yes, no), smoking status (never, past, current), drinking status (never, 1-2 times/week, 3-4 times/week, ≥5 times/week), healthy diet (yes, no), use of multivitamin/mineral supplements (yes, no), total physical activity level (MET-minutes/week, continuous), time spend outdoors in summer (continuous, hours/day), season of blood drawn (March to May, June to August, September to November, December to February), estimated glomerular filtration rate (eGFR, ≤90, >90 mL/min/1.73 m<sup>2</sup>), BMI (continuous), history of hypertension (yes, no), and hypercholesterolemia (yes, no), diabetic medication (no insulin or pills, only diabetes pills, or insulin and/or others), diabetes duration (≤3, 3-10 years, >10 years), HbA<sub>1c</sub> (<7%, ≥7% [ $<53$  nmol/L,  $\geq 53$  nmol/L]), LDL (mmol/L, continuous), HDL (mmol/L, continuous), triglyceride (mmol/L, continuous).
